# Supplementary material for: Effects of Pomegranate Juice Supplementation on Oxidative Stress Biomarkers Following Weightlifting Exercise
Source: MDPI journal article supplement (doi:10.3390/nu9080819), 2017-07-29
Supplement: s1 [file s1]

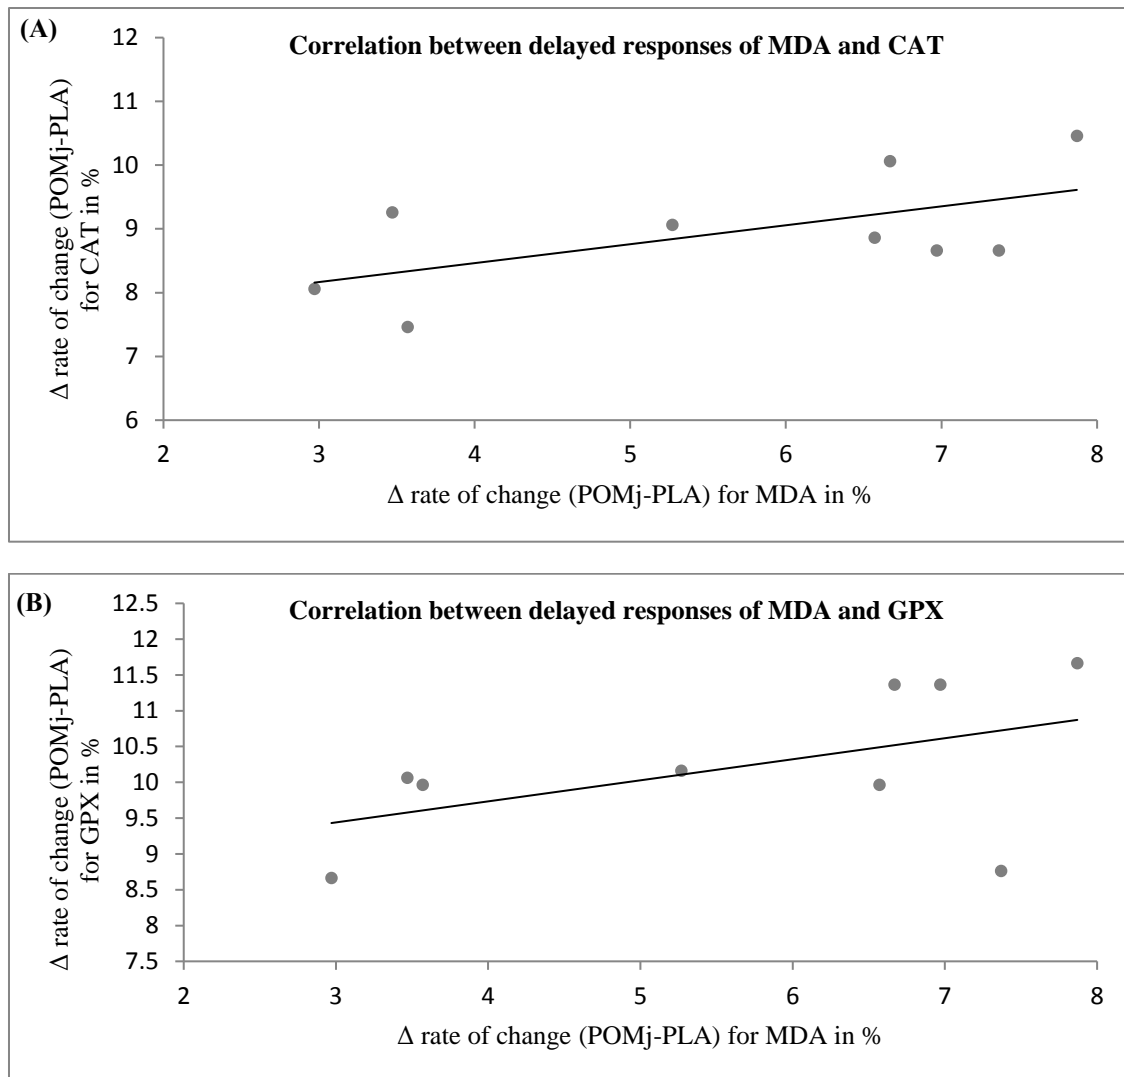

**Figure S2:** Regression line for the significant relationships between the lipid peroxidation and antioxidants delayed measures ( $\Delta$  rate of change % (POMj-PLA)) following weightlifting training session. (A) Correlation between delayed responses of MDA and CAT; (B) Correlation between delayed responses of MDA and GPX.
